# Supplementary material for: Finger-powered agglutination lab chip with CMOS image sensing for rapid point-of-care diagnosis applications
Source: Royal Society of Chemistry journal article supplement (doi:10.1039/c9lc00961b), 2019-12-24
Supplement: c9lc00961b1.pdf [file c9lc00961b1.pdf]

Supplementary Material (ESI) for Lab on a Chip

## **Finger-Powered Agglutination Lab Chip with CMOS Image Sensing for Rapid Point-of-Care Diagnosis Applications**

Chung Hsiang Lu,<sup>a</sup> Ting-Sheng Shih,<sup>a</sup> Po-Chen Shih,<sup>a</sup> Gaurav Prashant Pendharkar,<sup>a</sup> Cheng-En Liu,<sup>c</sup> Chi-Kuan Chen,<sup>b</sup> Long Hsu,<sup>c</sup> Hwan-You Chang,<sup>d</sup> Chia-Ling Yang<sup>a</sup> and Cheng-Hsien Liu<sup>a\*</sup>

<sup>a</sup> *Department of Power Mechanical Engineering, National Tsing Hua University, Hsinchu City 30013, Taiwan, R.O.C.*

<sup>b</sup> *MacKay Memorial Hospital, New Taipei City, Taiwan, R.O.C*

<sup>c</sup> *Department of Electrophysics, National Chiao-Tung University, Hsinchu, Taiwan 300, R.O.C.*

<sup>d</sup> *Institute of molecular medicine, National Tsing Hua University, Hsinchu, Taiwan 300, R.O.C.*

**Video.** Video S1 demonstrates and characterizes finger-powered pressure actuator, S2 demonstrates the feature of plasma separation membrane, and S3 demonstrates the full function of finger-powered agglutination lab chip.
